# Supplementary material
Source: ML conference proceedings conference paper supplement (https://openaccess.thecvf.com/content/CVPR2022/html/Gwilliam_Beyond_Supervised_vs._CVPR_2022_paper.html)
Supplement: Supplementary file 1 [file Gwilliam_Beyond_Supervised_vs._CVPR_2022_supplemental.pdf]

# Beyond Supervised vs. Unsupervised: Representative Benchmarking and Analysis of Image Representation Learning

## Supplementary Material

### A. Code and Assets

To reproduce our results, please visit our repository at <https://github.com/mgwillia/unsupervised-analysis>. Where specified (see our repository for details), we use code from VISSL (<https://github.com/facebookresearch/vissl/>) and SCAN (<https://github.com/wvangansbeke/Unsupervised-Classification>). These repositories have an MIT License and Creative Commons License, respectively.

### B. k-NN Details

For k-NN classification, we use the VISSL defaults for ImageNet: 200 neighbors. For the FGVC datasets, there are too few images per class to use this approach. Instead, we try values in the set  $\{0, 5, 10, 15, 20, 25, 30, 35, 40, 45, 50\}$  and choose whichever value maximizes accuracy.

### C. More Benchmark Results

Here, we give an expanded look at our benchmarks. Table 1 complements Figure 3 by providing the same data, in tabular form. Figures 1 and 2 along with Tables 2 and 3 do the same for k-NN and k-means, offering an expansion of the results shown in Tables 2 and 3.

We verify claims we make about the SimCLR models from the main paper. Specifically, we say that training time has a significant impact on results, while not changing the representations substantially (see Figure 6). Table 4 offers evidence supporting our claim.

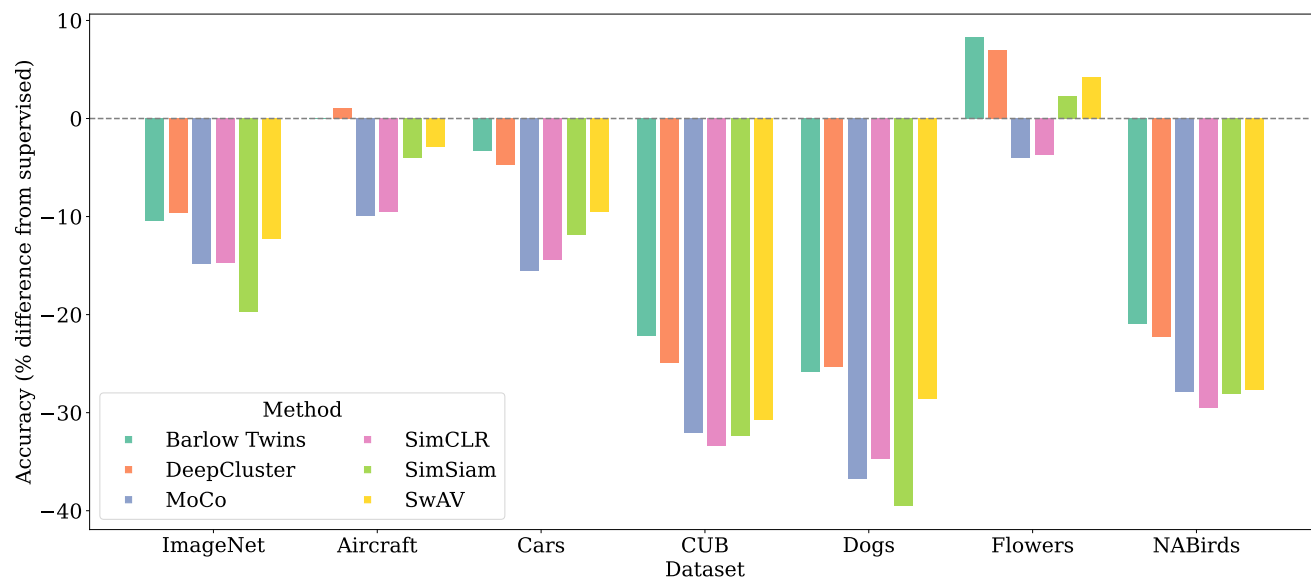

Figure 1. **k-NN results.**

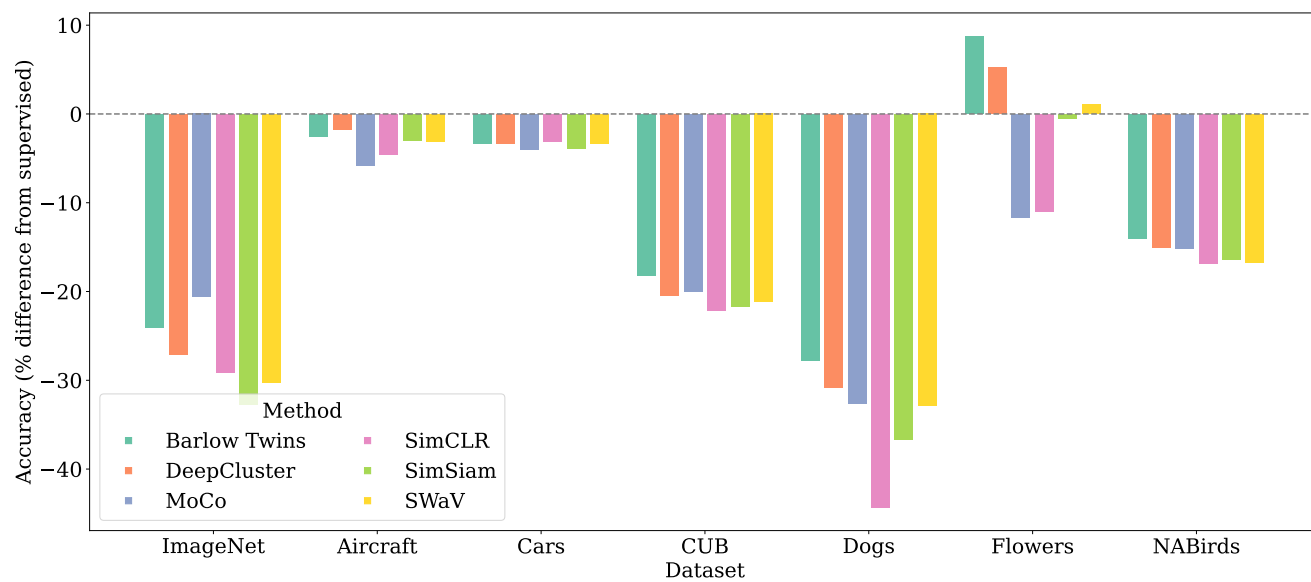

Figure 2. **K-Means results.**

Table 1. **Linear evaluation results.**

| Method       | Dataset      |              |              |              |              |              |              |
|--------------|--------------|--------------|--------------|--------------|--------------|--------------|--------------|
|              | ImageNet     | Aircraft     | Cars         | CUB          | Dogs         | Flowers      | NABirds      |
| Supervised   | <b>76.04</b> | 48.05        | 57.72        | <b>70.57</b> | <b>88.92</b> | 91.30        | <b>61.10</b> |
| Barlow Twins | 71.78        | <b>58.51</b> | 65.30        | 63.98        | 74.35        | 94.21        | 54.59        |
| DeepCluster  | 75.19        | 58.36        | <b>67.76</b> | 69.82        | 77.80        | <b>94.46</b> | 59.89        |
| MoCo         | 69.95        | 49.88        | 49.68        | 51.95        | 67.93        | 91.14        | 43.51        |
| SimCLR       | 68.95        | 44.39        | 45.00        | 47.36        | 65.84        | 88.90        | 38.43        |
| SimSiam      | 67.89        | 52.22        | 53.34        | 52.55        | 66.50        | 91.86        | 44.18        |
| SwAV         | 74.87        | 55.73        | 61.95        | 65.10        | 75.99        | 93.97        | 56.52        |

Table 2. **k-NN results.**

| Method       | Dataset  |          |       |       |       |         |         |
|--------------|----------|----------|-------|-------|-------|---------|---------|
|              | ImageNet | Aircraft | Cars  | CUB   | Dogs  | Flowers | NABirds |
| Supervised   | 73.41    | 31.59    | 30.16 | 56.63 | 88.38 | 77.96   | 43.25   |
| Barlow Twins | 62.90    | 31.83    | 26.94 | 34.41 | 62.53 | 86.18   | 22.29   |
| DeepCluster  | 63.70    | 32.70    | 25.48 | 31.74 | 62.97 | 84.76   | 21.05   |
| MoCo         | 58.59    | 21.39    | 14.64 | 24.35 | 51.60 | 74.53   | 15.40   |
| SimCLR       | 54.57    | 21.21    | 14.74 | 23.21 | 49.63 | 74.78   | 14.03   |
| SimSiam      | 53.66    | 27.39    | 18.41 | 24.20 | 48.97 | 80.01   | 15.18   |
| SwAV         | 61.14    | 28.77    | 20.84 | 25.75 | 59.87 | 82.24   | 15.72   |

Table 3. **K-Means results.**

| Method       | Dataset  |          |       |       |       |         |         |
|--------------|----------|----------|-------|-------|-------|---------|---------|
|              | ImageNet | Aircraft | Cars  | CUB   | Dogs  | Flowers | NABirds |
| Supervised   | 58.92    | 15.69    | 11.95 | 35.23 | 53.69 | 54.97   | 25.95   |
| DeepCluster  | 31.79    | 13.92    | 8.66  | 14.81 | 22.84 | 60.20   | 10.86   |
| MoCo         | 38.30    | 9.84     | 7.98  | 15.21 | 21.10 | 43.34   | 10.75   |
| Barlow Twins | 34.88    | 13.20    | 8.63  | 17.07 | 25.94 | 63.70   | 11.87   |
| SimCLR       | 29.78    | 11.16    | 8.80  | 13.07 | 9.41  | 43.99   | 9.08    |
| SimSiam      | 26.20    | 12.66    | 8.03  | 13.57 | 17.07 | 54.51   | 9.53    |
| SwAV         | 28.69    | 12.60    | 8.66  | 14.05 | 20.79 | 56.04   | 9.26    |

Table 4. **Linear Evaluation for SimCLR** with varying training time.

| Method      | Dataset      |              |              |              |              |              |              |
|-------------|--------------|--------------|--------------|--------------|--------------|--------------|--------------|
|             | ImageNet     | Aircraft     | Cars         | CUB          | Dogs         | Flowers      | NABirds      |
| 100 Epochs  | 64.76        | 44.81        | 44.67        | 43.17        | 60.44        | 88.72        | 34.34        |
| 200 Epochs  | 66.92        | <b>45.56</b> | 46.31        | 46.05        | 62.48        | <b>89.39</b> | 36.90        |
| 400 Epochs  | 67.93        | 44.84        | <b>46.36</b> | 46.00        | 64.35        | 89.08        | 37.23        |
| 800 Epochs  | <b>68.95</b> | 44.39        | 45.00        | <b>47.36</b> | 65.84        | 88.90        | <b>38.43</b> |
| 1000 Epochs | 64.57        | 45.26        | 44.55        | 46.93        | <b>66.25</b> | 88.57        | 37.93        |
